# Supplementary material for: How pervasive is corporate fraud?
Source: Springer Nature journal article supplement (doi:10.1007/s11142-022-09738-5), 2023-01-05
Supplement: MOESM1 [file 11142_2022_9738_MOESM1_ESM.xlsx]

## Sheet: AT1
Appendix Table A1: Propensity Score Matched, Collapsed Tests: Were AA Clients Committing Corporate More Fraud in the Pre-Period?
The sample is a cross section of firms with $750 million in assets and a Big Five auditor during 1998-2000. Estimation in Panel A is limited to only Texas-headquartered firms. Panel B replicates panel A for the entire United States. Estimation is a propensity-matched estimation. For each AA client firm, we find a non-AA match in the same two digit SIC code, matched on the propensity of assets, sa…
Panel A: Texas Only Estimates
	(1)	(2)	(3)	(4)	(5)	(6)	(7)	(8)	(9)	(10)	(11)	(12)
	Manipulation (ProbM)		Fraud Score (Fscore)		Auditor-Detected		AAERs		Restatements: Acctng.		SCAC Securities Fraud
Arthur Andersen	0.206	0.183	0.302	0.769	0.0179	0.0144	0.0446	0.0393	0.0446	0.0463	0.0179	0.0158
	[0.242]	[0.230]	[1.908]	[1.702]	[0.0177]	[0.0140]	[0.0399]	[0.0352]	[0.0605]	[0.0601]	[0.0215]	[0.0190]
Log Assets		-0.0697		-0.492		0.0178		0.0223		0.017		0.0092
		[0.0796]		[0.737]		[0.0168]		[0.0272]		[0.0318]		[0.0114]
Sales / Assets		0.163		-0.952		-0.00122		-0.00826		-0.0251*		-0.00538
		[0.0997]		[1.501]		[0.00238]		[0.0101]		[0.0138]		[0.00447]
EBITDA / Sales		-4.224***		-37.74*		0.0815		-0.454**		-0.186		-0.119
		[1.311]		[19.61]		[0.0794]		[0.223]		[0.300]		[0.104]
LT Debt/Assets		-0.644		-22.19		0.0616		-0.200**		0.0756		-0.0944
		[0.783]		[13.58]		[0.0577]		[0.0918]		[0.142]		[0.0819]
Observations	161	161	164	164	188	188	188	188	188	188	188	188
R-squared	0.005	0.089	0	0.101	0.009	0.053	0.011	0.077	0.005	0.021	0.005	0.032
Panel B: United States Estimates
	(1)	(2)	(3)	(4)	(5)	(6)	(7)	(8)	(9)	(10)	(11)	(12)
	Manipulation (ProbM)		Fraud Score (Fscore)		Auditor-Detected		AAERs		Restatements: Acctng.		SCAC Securities Fraud
Arthur Andersen	-0.00318	-0.0155	-0.191	-0.098	0.00347	0.00458	-0.00867	-0.00732	0.0191	0.0197	-0.00433	-0.00236
	[0.0752]	[0.0711]	[0.717]	[0.715]	[0.00532]	[0.00546]	[0.0107]	[0.0107]	[0.0173]	[0.0173]	[0.0109]	[0.0108]
Log Assets		-0.118***		-0.215		0.0145***		0.0229***		-0.000107		0.0103
		[0.0273]		[0.351]		[0.00536]		[0.00774]		[0.00794]		[0.00643]
Sales / Assets		0.296***		-0.466		0.0055		0.0202**		0.00387		-0.00274
		[0.0567]		[0.373]		[0.00472]		[0.00939]		[0.0116]		[0.00568]
EBITDA / Sales		-3.601***		-25.31***		-0.0697*		-0.0976		-0.253**		-0.360***
		[0.604]		[8.869]		[0.0396]		[0.0615]		[0.123]		[0.0949]
LT Debt/Assets		-0.131		-6.316**		0.0182		0.0173		0.0104		-0.0422
		[0.200]		[2.841]		[0.0151]		[0.0274]		[0.0465]		[0.0320]
Observations	1628	1628	1640	1640	1937	1937	1937	1937	1937	1937	1937	1937
R-squared	0	0.097	0	0.031	0	0.026	0.001	0.025	0.001	0.006	0	0.027

## Sheet: AT2
Appendix Table A2: Industry and Region of Corporate Fraud Cases in Experiment
The sample is US publicly traded corporations with more than $750 million in assets. Auditor-detected frauds are frauds in the DMZ (2010) sample of class action frauds which were detected by an auditor either by an auditor resignation or by the auditor issuing a qualified opinion and either the firm or analysts revealing the fraud. Restatements are from AuditAnalytics and refer to restatements tr…
Panel A: Correlations among Fraud Measures
		Auditor Detected	AAER	Restatements	SCAC
		Sample: 2757 firms (1 observation per firm) over the period 11/2001-12/2003
Severe Financial Reporting Violations
	Auditor-Detected Fraud	1
	AAERs	0.152	1
Restatements
	Restatements (filtered)	0.104	0.129	1
Securities Fraud at large
	SCAC Securities Fraud	0.348	0.1899	0.1196	1
		*Note: All Correlations are statistically significant at < 1% level
Panel B: Corporate Fraud Incidence by Industry
		Auditor Detected	AAER	Restatements	SCAC
		Sample: 2757 firms (1 observation per firm) over the period 11/2001-12/2003
	Agriculture	--	--	0.00527704	--
	Banks Insurance	0.333333	0.247863	0.240106	0.246154
	Chemicals	--	--	0.0237467	0.0153846
	CommunicationTransport	0.208333	0.119658	0.129288	0.130769
	Computers	0.0833333	0.153846	0.0976253	0.146154
	Durable Manufacturing	--	0.0940171	0.0580475	0.0307692
	Food Tobacco	--	0.025641	0.0369393	--
	Lumber Furniture Printing	--	0.017094	0.0105541	0.0384615
	Mining Construction	--	--	0.0211082	--
	Pharmaceuticals	0.0625	0.017094	0.0131926	0.1
	Refining & Extractive	--	0.00854701	0.0290237	0.0307692
	Retail & Wholesale	0.0416667	0.119658	0.0976253	0.0230769
	Services & Health	0.0833333	0.102564	0.055409	0.0307692
	Textile Apparel	--	--	0.0184697	--
	Utilities	0.1875	0.0940171	0.163588	0.207692
	Total	1	1	1	1
Panel C: Corporate Fraud Incidence by Region
		Auditor Detected	AAER	Restatements	SCAC
		Sample: 2757 firms (1 observation per firm) over the period 11/2001-12/2003
	Midwest	0.166667	0.264957	0.253298	0.253846
	Mountain	0.0416667	0.017094	0.055409	0.0461538
	Northeast	0.333333	0.299145	0.211082	0.338462
	Southeast	0.291667	0.196581	0.150396	0.153846
	Southwest	0.125	0.102564	0.158311	0.123077
	West	0.0416667	0.119658	0.166227	0.0846154
	Territories	--	--	0.00527704	--
	Total	1	1	1	1
